# Supplementary material for: Lysosomal Dysfunction: Connecting the Dots in the Landscape of Human Diseases
Source: MDPI journal article supplement (doi:10.3390/biology13010034), 2024-01-07
Supplement: s1 [file s1]

| Gene  | Disease                      | Position (GRCh38.p12)  | Change      | Type         | dbSNP rsid   | Ref   |
|-------|------------------------------|------------------------|-------------|--------------|--------------|-------|
| GALNS | MPS IVA (Morquio A syndrome) | chr16:88841948         | G>A         | Missense     | rs1028668536 | [73]  |
|       |                              | chr16:88841077         | T>A         | Missense     | rs118204438  | [118] |
|       |                              | chr16:88835794         | C>T         | Stop Gained  | rs118204449  | [89]  |
|       |                              | chr16:88837646         | T>C         | Missense     | rs786205899  | [117] |
|       |                              | chr16:88836222         | G>C         | Missense     | rs118204435  | [97]  |
|       |                              | chr16:88841936         | G>A / G>C   | Missense     | rs118204441  | [67]  |
|       |                              | chr16:88835335         | C>T         | Missense     | rs118204442  | [51]  |
|       |                              | chr16:88832065         | G>C         | Missense     | rs118204446  | [104] |
|       |                              | chr16:88842772         | C>T         | Missense     | rs118204447  | [89]  |
|       |                              | chr16:88835240         | C>A / C>T   | Missense     | rs118204448  | [89]  |
|       |                              | chr16:88826822         | C>T         | Missense     | rs267606838  | [88]  |
| GLB1  | MPS IVB (Morquio B syndrome) | chr3:33014263          | C>A         | Missense     | rs72555363   | [64]  |
|       |                              | chr3:33014280          | insCT       | Frameshift   | rs1553606128 | [111] |
|       |                              | chr3:33051951-33051952 | delG        | Frameshift   | rs1553610382 | [76]  |
|       |                              | chr3:33053518          | C>G         | Missense     | rs1553610553 | [47]  |
|       |                              | chr3:33068968          | T>C         | Missense     | rs1553612220 | [48]  |
|       |                              | chr3:33058220          | C>T         | Missense     | rs189115557  | [56]  |
|       |                              | chr3:33068245          | G>A / G>T   | Missense     | rs192732174  | [121] |
|       |                              | chr3:33014213-33014218 | delC / dupC | Frameshift   | rs794729217  | [128] |
|       |                              | chr3:32997311          | G>A / G>T   | Missense     | rs794727165  | [129] |
|       |                              | chr3:33068241          | G>A         | Missense     | rs778700089  | [54]  |
|       |                              | chr3:33072543          | C>G / C>T   | Splice Donor | rs778423653  | [62]  |
| HYAL1 | MPS IX                       | chr3:50302155          | C>T         | Missense     | rs104893743  | [110] |
| IDUA  | MPS type I (Hurler syndrome) | chr4:1002747           | G>A         | Stop Gained  | rs121965019  | [114] |
|       |                              | chr4:1002117           | C>T         | Stop Gained  | rs121965023  | [87]  |
|       |                              | chr4:1004292           | C>G / C>T   | Stop Gained  | rs121965025  | [92]  |
|       |                              | chr4:1002087           | G>A         | Missense     | rs121965030  | [87]  |
|       |                              | chr4:1002333           | T>G         | Missense     | rs121965033  | [65]  |

| Gene            | Disease                       | Position (GRCh38.p12)    | Change               | Type             | dbSNP rsid  | Ref   |
|-----------------|-------------------------------|--------------------------|----------------------|------------------|-------------|-------|
| IDUA<br>(Cont.) |                               | chr4:1002275             | G>C                  | Missense         | rs199801029 | [61]  |
|                 |                               | chr4:1004391             | T>G                  | Stop Lost        | rs387906504 | [58]  |
|                 |                               | chr4:1004083             | delC                 | Stop Gained      | rs398123258 | [85]  |
|                 |                               | chr4:1001672             | G>A / G>C            | Intron           | rs762411583 | [69]  |
|                 |                               | chr4:1002325             | C>A / C>G            | Stop Gained      | rs764196171 | [69]  |
|                 |                               | chr4:1001701-1001706     | dupTGCTC             | Frameshift       | rs786200915 | [91]  |
|                 |                               | chr4:1001742             | T>C                  | Missense         | rs869025584 | [90]  |
|                 |                               | chr4:1002747             | G>A                  | Stop Gained      | rs121965019 | [114] |
|                 |                               | chr4:1003418             | C>G / C>T            | Missense         | rs121965021 | [108] |
|                 |                               | chr4:1002392             | A>C                  | Missense         | rs121965024 | [78]  |
|                 |                               | chr4:1003108             | G>A / G>C            | Missense         | rs121965026 | [58]  |
|                 |                               | chr4:1003102             | T>C                  | Missense         | rs121965027 | [58]  |
|                 |                               | chr4:1004286             | C>A / C>G / C>T      | Stop Gained      | rs121965031 | [93]  |
|                 |                               | chr4:1002333             | T>G                  | Missense         | rs121965033 | [65]  |
|                 |                               | chr4:1003418             | C>G / C>T            | Missense         | rs121965021 | [65]  |
| IDS             | MPS type II (Hunter syndrome) | chrX:149482996           | C>A / C>G / C>T      | Missense         | rs113993946 | [102] |
|                 |                               | chrX:149498308           | C>G / C>T            | Splice Acceptor  | rs113993947 | [130] |
|                 |                               | chrX:149482974           | C>T                  | Stop Gained      | rs199422230 | [103] |
|                 |                               | chrX:149498305-149498307 | delGT                | Frameshift       | rs483352904 | [103] |
|                 |                               | chrX:149503379-149503382 | delGAG               | Inframe Deletion | rs483352905 | [53]  |
|                 |                               | chrX:149504189-149504191 | dupG                 | Frameshift       | rs797044671 | [82]  |
|                 |                               | chrX:149500992-149500993 | delAAinsCCAGCTATACGG | Frameshift       | rs869025304 | [130] |
|                 |                               | chrX:149496458-149496474 | delACCTCGGGATCGGG    | Stop Gained      | rs869025305 | [130] |
|                 |                               | chrX:149486972-149486975 | delAA                | Frameshift       | rs869025306 | [130] |
|                 |                               | chrX:149482936           | delA                 | Frameshift       | rs869025307 | [130] |
|                 |                               | chrX:149490313           | C>A                  | Splice Donor     | rs869025308 | [130] |
|                 |                               | chrX:149500977           | G>C / G>T            | Missense         | rs104894856 | [52]  |
|                 |                               | chrX:149503326           | T>C                  | Missense         | rs104894861 | [103] |

| Gene           | Disease                                    | Position (GRCh38.p12)   | Change          | Type        | dbSNP rsid   | Ref   |
|----------------|--------------------------------------------|-------------------------|-----------------|-------------|--------------|-------|
| IDS<br>(cont.) |                                            | chrX:149482894          | C>G             | Missense    | rs199422228  | [52]  |
|                |                                            | chrX:149483135          | A>C             | Missense    | rs199422229  | [103] |
|                |                                            | chrX:149482997          | G>A             | Missense    | rs199422231  | [49]  |
| SGSH           | MPS type IIIA (Sanfilippo syndrome type A) | chr17:80213815          | C>A / C>T       | Missense    | rs104894635  | [63]  |
|                |                                            | chr17:80217084          | G>A / G>C       | Missense    | rs104894637  | [55]  |
|                |                                            | chr17:80213876          | A>G             | Missense    | rs1057521801 | [74]  |
|                |                                            | chr17:80212128          | A>G             | Missense    | rs138504221  | [119] |
|                |                                            | chr17:80213852          | G>A / G>C       | Stop Gained | rs374621913  | [74]  |
|                |                                            | chr17:80210881-80210882 | delG            | Frameshift  | rs770947426  | [85]  |
|                |                                            | chr17:80210826          | delC            | Frameshift  | rs777956287  | [84]  |
|                |                                            | chr17:80210934-80210935 | dupG            | Frameshift  | rs778700037  | [85]  |
|                |                                            | chr17:80214672          | C>T             | Missense    | rs104894638  | [101] |
|                |                                            | chr17:80210856          | C>A / C>G / C>T | Stop Gained | rs104894640  | [46]  |
|                |                                            | chr17:80214738          | G>A             | Missense    | rs104894642  | [46]  |
|                |                                            | chr17:80214218          | C>G / C>T       | Missense    | rs104894643  | [44]  |
|                |                                            | chr17:80217061          | G>A             | Missense    | rs104894636  | [66]  |
|                |                                            | chr17:80210663          | C>T             | Missense    | rs104894641  | [46]  |
|                |                                            | chr17:80212128          | A>G             | Missense    | rs138504221  | [94]  |
|                |                                            | chr17:80213815          | C>A / C>T       | Missense    | rs104894635  | [68]  |
| NAGLU          | MPS type IIIB (Sanfilippo syndrome type B) | chr17:42543882          | C>G / C>T       | Stop Gained | rs104894591  | [83]  |
|                |                                            | chr17:42541074          | C>T             | Stop Gained | rs104894592  | [122] |
|                |                                            | chr17:42543699          | C>T             | Missense    | rs104894597  | [60]  |
|                |                                            | chr17:42543700          | G>A / G>C / G>T | Missense    | rs104894598  | [95]  |
|                |                                            | chr17:42541127          | C>G             | Missense    | rs118204025  | [81]  |
|                |                                            | chr17:42543997          | C>T             | Missense    | rs746006696  | [45]  |
|                |                                            | chr17:42537494          | delT            | Frameshift  | rs886039894  | [50]  |
|                |                                            | chr17:42543950          | dupG            | Frameshift  | rs886039895  | [50]  |
|                |                                            | chr17:42536414          | T>C             | Missense    | rs118204024  | [96]  |

| Gene             | Disease                                    | Position (GRCh38.p12)   | Change          | Type            | dbSNP rsid  | Ref   |
|------------------|--------------------------------------------|-------------------------|-----------------|-----------------|-------------|-------|
| NAGLU<br>(Cont.) |                                            | chr17:42544027          | G>A / G>T       | Missense        | rs104894590 | [83]  |
|                  |                                            | chr17:42543934          | G>A             | Missense        | rs104894593 | [83]  |
|                  |                                            | chr17:42543933          | C>A / C>T       | Missense        | rs104894594 | [127] |
|                  |                                            | chr17:42543568          | C>T             | Missense        | rs104894595 | [127] |
|                  |                                            | chr17:42543699          | C>T             | Missense        | rs104894597 | [127] |
|                  |                                            | chr17:42543700          | G>A / G>C / G>T | Missense        | rs104894598 | [127] |
|                  |                                            | chr17:42537433          | A>G             | Missense        | rs753520553 | [123] |
|                  |                                            | chr17:42543214          | T>C             | Missense        | rs796052122 | [45]  |
|                  |                                            | chr17:42538691          | C>T             | Missense        | rs104894601 | [79]  |
| HGSNAT           | MPS type IIIC (Sanfilippo syndrome type C) | chr8:43173740           | C>T             | Missense        | rs121908282 | [112] |
|                  |                                            | chr8:43178184           | T>G             | Stop Gained     | rs121908283 | [112] |
|                  |                                            | chr8:43193824           | T>A             | Missense        | rs121908284 | [112] |
|                  |                                            | chr8:43182162           | C>T             | Missense        | rs121908285 | [124] |
|                  |                                            | chr8:43197682           | C>T             | Missense        | rs121908286 | [80]  |
|                  |                                            | chr8:43159045           | G>A             | Splice Donor    | rs193066451 | [70]  |
|                  |                                            | chr8:43158921           | A>G             | Splice Acceptor | rs483352896 | [80]  |
|                  |                                            | chr8:43193790           | G>A             | Missense        | rs753355844 | [120] |
|                  |                                            | chr8:43158710           | A>T             | Missense        | rs754875934 | [115] |
|                  |                                            | chr8:43191554           | G>T             | Missense        | rs764206492 | [112] |
|                  |                                            | chr8:43158949           | G>C             | Missense        | rs797045120 | [115] |
| GNS              | MPS type IIID (Sanfilippo syndrome)        | chr12:64737039          | G>A             | Stop Gained     | rs119461974 | [59]  |
|                  |                                            | chr12:64728988          | G>A             | Stop Gained     | rs119461975 | [126] |
|                  |                                            | chr12:64728987          | delT            | Frameshift      | rs483352898 | [125] |
|                  |                                            | chr12:64729017-64729018 | insAGGAC        | Frameshift      | rs483352899 | [126] |
|                  |                                            | chr12:64723088          | dupC            | Frameshift      | rs483352900 | [116] |
| ARSB             | MPS type VI (Maroteaux-Lamy syndrome)      | chr5:78969095           | C>A / C>T       | Missense        | rs118203938 | [100] |
|                  |                                            | chr5:78969156           | A>G             | Missense        | rs118203939 | [98]  |
|                  |                                            | chr5:78955486           | A>G             | Missense        | rs118203940 | [98]  |

| Gene            | Disease                     | Position (GRCh38.p12)  | Change    | Type            | dbSNP rsid  | Ref   |
|-----------------|-----------------------------|------------------------|-----------|-----------------|-------------|-------|
| ARSB<br>(Cont.) |                             | chr5:78985011-78985014 | delC      | Frameshift      | rs431905493 | [113] |
|                 |                             | chr5:78839427          | C>G       | Splice Acceptor | rs431905495 | [86]  |
|                 |                             | chr5:78839434          | A>C       | Intron          | rs431905496 | [71]  |
|                 |                             | chr5:78984965          | C>G / C>T | Missense        | rs118203942 | [72]  |
|                 |                             | chr5:78839391          | T>C / T>G | Missense        | rs118203944 | [72]  |
|                 |                             | chr5:78964477          | T>C       | Missense        | rs118203943 | [72]  |
| GUSB            | MPS type VII (Sly syndrome) | chr7:65967863          | C>T       | Stop Gained     | rs121918179 | [57]  |
|                 |                             | chr7:65979782          | G>A       | Missense        | rs121918181 | [109] |
|                 |                             | chr7:65974701          | G>A       | Stop Gained     | rs121918185 | [106] |
|                 |                             | chr7:65967767          | G>A       | Synonymous      | rs377519272 | [57]  |
|                 |                             | chr7:65973676-65973677 | delGA     | Intron          | rs786200863 | [75]  |
|                 |                             | chr7:65974348          | C>T       | Stop Gained     | rs121918180 | [75]  |
|                 |                             | chr7:65974626          | G>A       | Missense        | rs121918173 | [99]  |
|                 |                             | chr7:65979477          | G>A       | Missense        | rs121918174 | [77]  |
|                 |                             | chr7:65974923          | G>A       | Missense        | rs121918175 | [107] |
|                 |                             | chr7:65974923          | G>A       | Missense        | rs121918176 | [107] |
|                 |                             | chr7:65979866          | G>A       | Missense        | rs121918177 | [57]  |
|                 |                             | chr7:65967900          | T>C       | Missense        | rs121918178 | [57]  |
|                 |                             | chr7:65974934          | C>G / C>T | Missense        | rs121918182 | [105] |
|                 |                             | chr7:65964382          | C>A       | Missense        | rs121918183 | [105] |
|                 |                             | chr7:65960972          | C>A       | Missense        | rs121918184 | [43]  |
|                 |                             | chr7:65960997          | G>A       | Missense        | rs121918172 | [99]  |

Supplementary table S1: Clinically relevant SNPs in Mucopolysaccharidoses.

| Gene | Disease       | Position (GRCh38.p12)   | Change          | Type            | dbSNP rsid   | Ref   |
|------|---------------|-------------------------|-----------------|-----------------|--------------|-------|
| GAA  | Pompe disease | chr17:80113361-80113362 | delC            | Frameshift      | rs1057516581 | [149] |
|      |               | chr17:80102793          | A>C             | Intron          | rs12450199   | [150] |
|      |               | chr17:80110837          | G>A             | Stop Gained     | rs140826989  | [172] |
|      |               | chr17:80113350          | C>A / C>T       | Missense        | rs121907938  | [154] |
|      |               | chr17:80107818          | G>A             | Missense        | rs121907945  | [169] |
|      |               | chr17:80107894          | T>A / T>C       | Missense        | rs121907936  | [172] |
|      |               | chr17:80113242          | G>A / G>C       | Missense        | rs1800309    | [160] |
|      |               | chr17:80112072          | G>A             | Missense        | rs1800307    | [166] |
|      |               | chr17:80110726          | G>C / G>T       | Splice Acceptor | rs147804176  | [172] |
|      |               | chr17:80108512          | T>C             | Missense        | rs1555600061 | [172] |
|      |               | chr17:80113309-80113310 | CA>GG           | Missense        | rs1555601773 | [149] |
|      |               | chr17:80117016          | G>A / G>C       | Stop Gained     | rs1800312    | [172] |
|      |               | chr17:80107616          | C>T             | Missense        | rs200856561  | [172] |
|      |               | chr17:80112664          | C>A / C>T       | Missense        | rs369531647  | [171] |
|      |               | chr17:80112922          | C>A / C>T       | Missense        | rs28940868   | [149] |
|      |               | chr17:80104552          | C>A / C>T       | Intron          | rs1055945806 | [168] |
|      |               | chr17:80108609          | T>C             | Splice Donor    | rs1057516215 | [157] |
|      |               | chr17:80117005          | C>T             | Stop Gained     | rs1057516277 | [164] |
|      |               | chr17:80108487          | A>G             | Splice Acceptor | rs1057516290 | [155] |
|      |               | chr17:80116992          | G>A             | Stop Gained     | rs1057516328 | [155] |
|      |               | chr17:80112081          | G>A / G>C       | Missense        | rs991082382  | [174] |
|      |               | chr17:80112680          | C>G / C>T       | Missense        | rs914396317  | [146] |
|      |               | chr17:80110953          | C>A / C>G / C>T | Missense        | rs892129065  | [148] |
|      |               | chr17:80118210-80118213 | delCA           | Frameshift      | rs886043343  | [168] |
|      |               | chr17:80110950          | G>A             | Missense        | rs121907937  | [162] |
|      |               | chr17:80107837          | T>C / T>G       | Missense        | rs121907940  | [168] |
|      |               | chr17:80110974-80110975 | TC>GT           | Missense        | rs121907941  | [147] |
|      |               | chr17:80111023          | C>T             | Missense        | rs121907942  | [158] |

| Gene           | Disease       | Position (GRCh38.p12)    | Change      | Type         | dbSNP rsid   | Ref   |
|----------------|---------------|--------------------------|-------------|--------------|--------------|-------|
| GAA<br>(Cont.) |               | chr17:80118271           | C>T         | Stop Gained  | rs121907943  | [161] |
|                |               | chr17:80107574           | C>A / C>T   | Missense     | rs121907944  | [162] |
|                |               | chr17:80118752           | G>T         | Missense     | rs1221948995 | [161] |
|                |               | chr17:80119318           | T>A         | Missense     | rs1245412108 | [167] |
|                |               | chr17:80117675           | C>T         | Stop Gained  | rs1344266804 | [159] |
|                |               | chr17:80112643           | G>A         | Missense     | rs1393386120 | [163] |
|                |               | chr17:80112892           | C>A / C>T   | Missense     | rs1414146587 | [175] |
| LAMP2          | Danon disease | chrX:120449006           | G>A         | Stop Gained  | rs104894857  | [153] |
|                |               | chrX:120442599           | C>T         | Missense     | rs104894858  | [156] |
|                |               | chrX:120448978-120448980 | delCTCinsTA | Frameshift   | rs1060502302 | [165] |
|                |               | chrX:120449086           | A>T         | Stop Gained  | rs137852527  | [170] |
|                |               | chrX:120442650           | G>A / G>T   | Stop Gained  | rs727503118  | [152] |
|                |               | chrX:120446304           | C>A / C>T   | Splice Donor | rs727503119  | [173] |
|                |               | chrX:120456650           | C>T         | Splice Donor | rs727503120  | [165] |
|                |               | chrX:120441729           | C>T         | Splice Donor | rs727504742  | [151] |

Supplementary table S2: Clinically relevant SNPs in Glycogenoses

| Gene | Disease                        | Position (GRCh38.p12)   | Change          | Type        | dbSNP rsid   | Ref   |
|------|--------------------------------|-------------------------|-----------------|-------------|--------------|-------|
| GLA  | Fabry disease                  | chrX:101398467          | C>A / C>T       | Missense    | rs104894828  | [208] |
|      |                                | chrX:101403846          | G>A             | Missense    | rs104894834  | [208] |
|      |                                | chrX:101401752          | C>A / C>G / C>T | Missense    | rs104894845  | [199] |
|      |                                | chrX:101398942          | T>C             | Missense    | rs28935197   | [198] |
|      |                                | chrX:101403843          | A>G / A>T       | Missense    | rs869312142  | [197] |
| GBA  | Gaucher disease                | chr1:155235252          | A>C / A>G       | Missense    | rs421016     | [195] |
| NPC1 | Niemann-Pick Disease<br>Type C | chr18:23552736          | C>G / C>T       | Intron      | rs1055204017 | [202] |
|      |                                | chr18:23560273-23560277 | delA            | Frameshift  | rs1057518711 | [212] |
|      |                                | chr18:23556527          | G>A             | Stop Gained | rs1474434210 | [213] |
|      |                                | chr18:23539826          | G>A             | Missense    | rs753768576  | [213] |
|      |                                | chr18:23556358          | C>T             | Missense    | rs139751448  | [210] |
|      |                                | chr18:23539447          | G>A             | Missense    | rs143124972  | [210] |
|      |                                | chr18:23536811          | G>A             | Missense    | rs28942104   | [210] |
|      |                                | chr18:23538610-23538611 | delCT           | Frameshift  | rs756815030  | [200] |
|      |                                | chr18:23534475-23534476 | delC            | Frameshift  | rs758231839  | [194] |
|      |                                | chr18:23544987-23544990 | delC            | Frameshift  | rs886042270  | [202] |
|      |                                | chr18:23538564          | G>C             | Missense    | rs80358257   | [201] |
|      |                                | chr18:23538609          | C>A / C>G / C>T | Missense    | rs80358254   | [201] |
|      |                                | chr18:23536736          | A>G             | Missense    | rs80358259   | [201] |
|      |                                | chr18:23538572          | G>A             | Missense    | rs150334966  | [207] |
|      |                                | chr18:23544402          | G>A             | Missense    | rs1555634422 | [211] |
|      |                                | chr18:23539878          | C>T             | Missense    | rs768999208  | [214] |
|      |                                | chr18:23536736          | A>G             | Missense    | rs80358259   | [196] |
| NPC2 | Niemann-Pick Disease<br>Type C | chr14:74486386          | G>A             | Stop Gained | rs80358262   | [204] |
|      |                                | chr14:74486378          | G>T             | Stop Gained | rs80358263   | [209] |
|      |                                | chr14:74484426          | C>A / C>T       | Stop Gained | rs80358266   | [205] |



| Gene            | Disease | Position (GRCh38.p12) | Change | Type     | dbSNP rsid  | Ref   |
|-----------------|---------|-----------------------|--------|----------|-------------|-------|
| NPC2<br>(Cont.) |         | chr14:74486324        | C>T    | Intron   | rs80358268  | [205] |
|                 |         | chr14:74484579        | A>G    | Missense | rs11694     | [206] |
|                 |         | chr14:74486404        | C>T    | Missense | rs80358261  | [206] |
|                 |         | chr14:74484483        | A>G    | Missense | rs80358264  | [206] |
|                 |         | chr14:74484420        | G>A    | Missense | rs104894458 | [203] |

Supplementary table S3: Clinically relevant SNPs in Sphingolipidoses.

| Gene | Disease                                   | Position (GRCh38.p12)   | Change          | Type of variant  | dbSNP rsid  | Ref   |
|------|-------------------------------------------|-------------------------|-----------------|------------------|-------------|-------|
| CLN3 | Neuronal Ceroid<br>Lipofuscinosis Type 3  | chr16:28482500          | C>A / C>T       | Stop Gained      | rs121434286 | [245] |
|      |                                           | chr16:28486427          | G>T             | Stop Gained      | rs267606737 | [257] |
|      |                                           | chr16:28487492-28487493 | delC            | Frameshift       | rs386833720 | [259] |
|      |                                           | chr16:28486617          | C>T             | Missense         | rs786201028 | [253] |
|      |                                           | chr16:28482500          | C>A / C>T       | Stop Gained      | rs121434286 | [252] |
| CLN6 | Neuronal Ceroid<br>Lipofuscinosis Type 6  | chr15:68214373          | C>A / C>G / C>T | Stop Gained      | rs104894483 | [248] |
|      |                                           | chr15:68209639          | G>A / G>C       | Stop Gained      | rs104894486 | [260] |
|      |                                           | chr15:68211289-68211294 | delATA          | Inframe Deletion | rs121908079 | [248] |
|      |                                           | chr15:68211698-68211705 | delATG          | Inframe Deletion | rs121908080 | [255] |
|      |                                           | chr15:68211845-68211850 | dupG            | Frameshift       | rs397515352 | [252] |
|      |                                           | chr15:68211765-68211768 | delAG           | Frameshift       | rs774543080 | [247] |
|      |                                           | chr15:68229578-68229579 | delC            | Frameshift       | rs786205065 | [247] |
|      |                                           | chr15:68211258          | C>A             | Intron           | rs786205066 | [260] |
|      |                                           | chr15:68214316-68214319 | dupCGTT         | Frameshift       | rs786205067 | [255] |
| CLN8 | Neuronal Ceroid<br>Lipofuscinosis Type 8  | chr15:68211793          | C>T             | Missense         | rs104894484 | [247] |
|      |                                           | chr8:1780316            | C>T             | Missense         | rs104894060 | [262] |
|      |                                           | chr8:1771142            | G>A / G>C / G>T | Missense         | rs137852883 | [254] |
| CTSD | Neuronal Ceroid<br>Lipofuscinosis Type 10 | chr8:1780495            | G>C             | Missense         | rs28940569  | [246] |
|      |                                           | chr11:1754969           | dupT            | Stop Gained      | rs786205105 | [243] |
|      |                                           | chr11:1758994           | C>A             | Missense         | rs797045137 | [241] |
|      |                                           | chr11:1753546           | C>T             | Missense         | rs797045138 | [241] |
|      |                                           | chr11:1757343           | A>T             | Missense         | rs121912789 | [242] |
|      |                                           | chr11:1753593           | C>G             | Missense         | rs121912790 | [242] |

| Gene  | Disease                                   | Position (GRCh38.p12)    | Change    | Type of variant | dbSNP rsid  | Ref   |
|-------|-------------------------------------------|--------------------------|-----------|-----------------|-------------|-------|
| CTSF  | Neuronal Ceroid<br>Lipofuscinosis Type 13 | chr11:66565841           | delG      | Frameshift      | rs753084727 | [244] |
|       |                                           | chr11:66568273           | C>G       | Splice Donor    | rs797045136 | [258] |
|       |                                           | chr11:66566320           | T>C       | Missense        | rs143889283 | [244] |
|       |                                           | chr11:66565833           | T>C       | Missense        | rs397514731 | [244] |
| MFSD8 | Neuronal Ceroid<br>Lipofuscinosis Type 7  | chr4:127930787           | A>C / A>G | Stop Gained     | rs118203977 | [256] |
|       |                                           | chr4:127938781           | A>T       | Splice Donor    | rs587778809 | [256] |
|       |                                           | chr4:127920743           | G>A       | Stop Gained     | rs724159971 | [250] |
|       |                                           | chr4:127932981-127932982 | insA      | Intron          | rs727502801 | [250] |
|       |                                           | chr4:127930752           | C>T       | Missense        | rs118203975 | [250] |
|       |                                           | chr4:127921588           | C>T       | Missense        | rs118203976 | [249] |
|       |                                           | chr4:127930800           | G>A / G>T | Missense        | rs140948465 | [251] |
|       |                                           | chr4:127921639           | G>A       | Missense        | rs267607235 | [261] |
|       |                                           | chr4:127943775           | C>A / C>T | Missense        | rs749704755 | [245] |

Supplementary table S4: Clinically relevant SNPs in Neuronal Ceroid-Lipofuscinoses.

| Gene   | Disease            | Position (GRCh38.p12)   | Change          | Genetic variant | dbSNP rsid  | Ref   |
|--------|--------------------|-------------------------|-----------------|-----------------|-------------|-------|
| CTSA   | Galactosialidosis  | chr20:45898068          | T>G             | Missense        | rs137854540 | [289] |
|        |                    | chr20:45894040          | T>A             | Missense        | rs137854544 | [289] |
|        |                    | chr20:45894002          | T>C             | Missense        | rs137854546 | [289] |
|        |                    | chr20:45898065          | G>A             | Missense        | rs137854547 | [289] |
|        |                    | chr20:45897769          | T>A / T>C       | Missense        | rs137854548 | [289] |
|        |                    | chr20:45898107          | A>G             | Missense        | rs137854549 | [286] |
|        |                    | chr20:45893314          | A>G             | Intron          | rs786200859 | [279] |
|        |                    | chr20:45894704-45894706 | delAT           | Frameshift      | rs875989777 | [281] |
|        |                    | chr20:45894040          | T>A             | Missense        | rs137854544 | [281] |
|        |                    | chr20:45897736          | A>G             | Missense        | rs137854543 | [285] |
| FUCA1  | Fucosidosis        | chr1:23845837           | G>A             | Stop Gained     | rs118204450 | [288] |
|        |                    | chr1:23848671           | C>A / C>G       | Stop Gained     | rs80358195  | [287] |
|        |                    | chr1:23868043           | G>A             | Stop Gained     | rs80358196  | [284] |
|        |                    | chr1:23848649           | C>T             | Stop Gained     | rs80358197  | [284] |
|        |                    | chr1:23863148           | G>A / G>T       | Stop Gained     | rs80358198  | [284] |
| MAN2B1 | Alpha-mannosidosis | chr19:12649418          | G>A             | Stop Gained     | rs121434331 | [278] |
|        |                    | chr19:12652376          | G>A             | Stop Gained     | rs121434332 | [278] |
|        |                    | chr19:12657482          | G>A / G>C / G>T | Stop Gained     | rs775200333 | [280] |
|        |                    | chr19:12655693          | C>G             | Splice Donor    | rs80338677  | [277] |
|        |                    | chr19:12652462          | T>C             | Splice Acceptor | rs80338678  | [276] |
|        |                    | chr19:12650103          | C>T             | Splice Donor    | rs80338679  | [276] |
|        |                    | chr19:12649932          | G>A / G>C / G>T | Missense        | rs80338680  | [277] |
|        |                    | chr19:12649146          | A>G             | Missense        | rs80338681  | [282] |
| MANBA  | Beta-mannosidosis  | chr4:102657873          | A>G             | Missense        | rs121434334 | [283] |
|        |                    | chr4:102726614          | C>A / C>T       | Stop Gained     | rs121434335 | [275] |
|        |                    | chr4:102669004          | G>A / G>C       | Stop Gained     | rs121434336 | [275] |

Supplementary table S5: Clinically relevant SNPs in Glycoproteinoses.
